# Supplementary material for: Single lithium-ion polymer electrolytes based on poly(ionic liquid)s for lithium-ion batteries
Source: Royal Society of Chemistry journal article supplement (doi:10.1039/c8sm00907d), 2018-01-01
Supplement: c8sm00907d1.pdf [file c8sm00907d1.pdf]

**Electronic Supplementary Information for**  
**Single Lithium-Ion Polymer Electrolytes Based on Poly (ionic**  
**liquid)s for Lithium-Ion Batteries**

*Yang Yu,<sup>a</sup> Fei Lu,<sup>\*,a</sup> Na Sun,<sup>a</sup> Aoli Wu,<sup>a</sup> Wei Pan<sup>b</sup> and Liqiang Zheng<sup>\*,a</sup>*

<sup>a</sup> Key Laboratory of Colloid and Interface Chemistry, Shandong University, Ministry of Education, Jinan, 250100, People's Republic of China

<sup>b</sup>College of Chemistry, Chemical Engineering and Materials Science, Shandong Normal University, Jinan, 250014, P. R. China

\*Corresponding author: Liqiang Zheng E-mail address: [lqzheng@sdu.edu.cn](mailto:lqzheng@sdu.edu.cn)

Fei Lu E-mail address: [lufei@mail.sdu.edu.cn](mailto:lufei@mail.sdu.edu.cn)

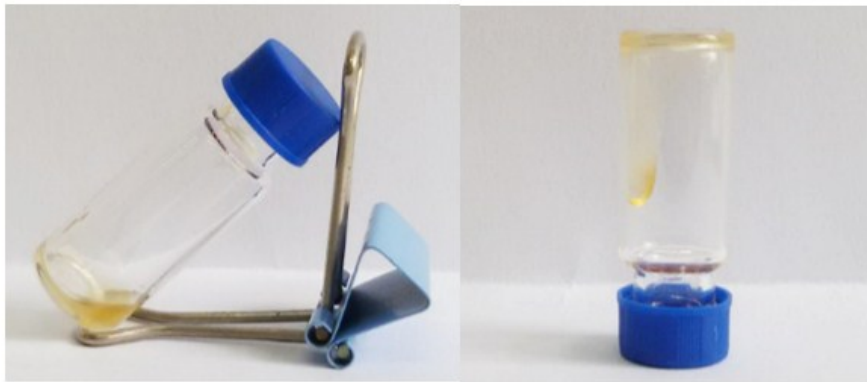

**Figure S1.** The photograph of the obtained PIL [LiSTFSI][VIPS].

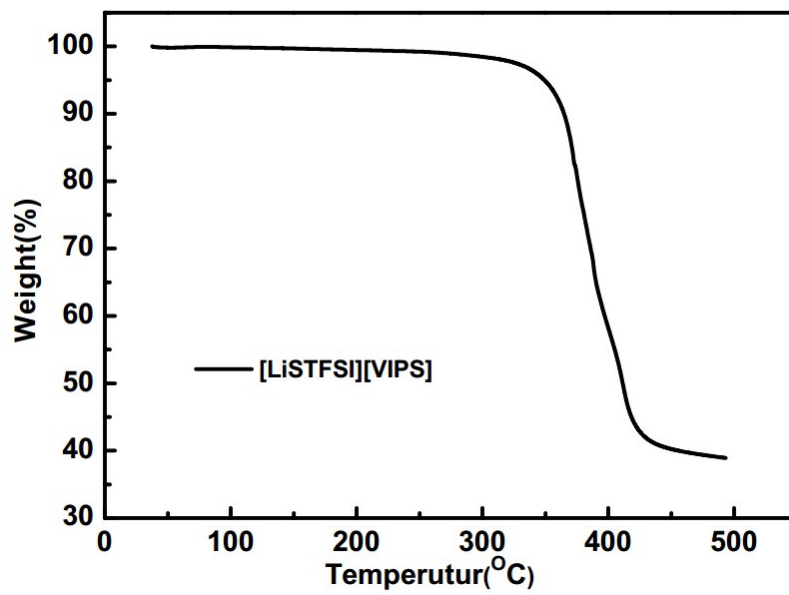

**Figure S2.** TGA traces measured under N<sub>2</sub> for [LiSTFSI][VIPS].

**Table S1.** Sample Composition in weight for SIPEs<sup>a</sup>

| Sample | LiSTFSI-VIPS(wt) | PEGM (wt) | PEGDM (wt) | PC (wt) |
|--------|------------------|-----------|------------|---------|
| SIPE1  | 5                | 60        | 5          | 30      |
| SIPE2  | 10               | 55        | 5          | 30      |
| SIPE3  | 20               | 45        | 5          | 30      |
| SIPE4  | 5                | 50        | 5          | 40      |
| SIPE5  | 10               | 45        | 5          | 40      |
| SIPE6  | 15               | 40        | 5          | 40      |
| SIPE7  | 5                | 40        | 5          | 50      |
| SIPE8  | 10               | 35        | 5          | 50      |
| SIPE9  | 15               | 30        | 5          | 50      |

<sup>a</sup> 1173 0.5% w/w of the monomers

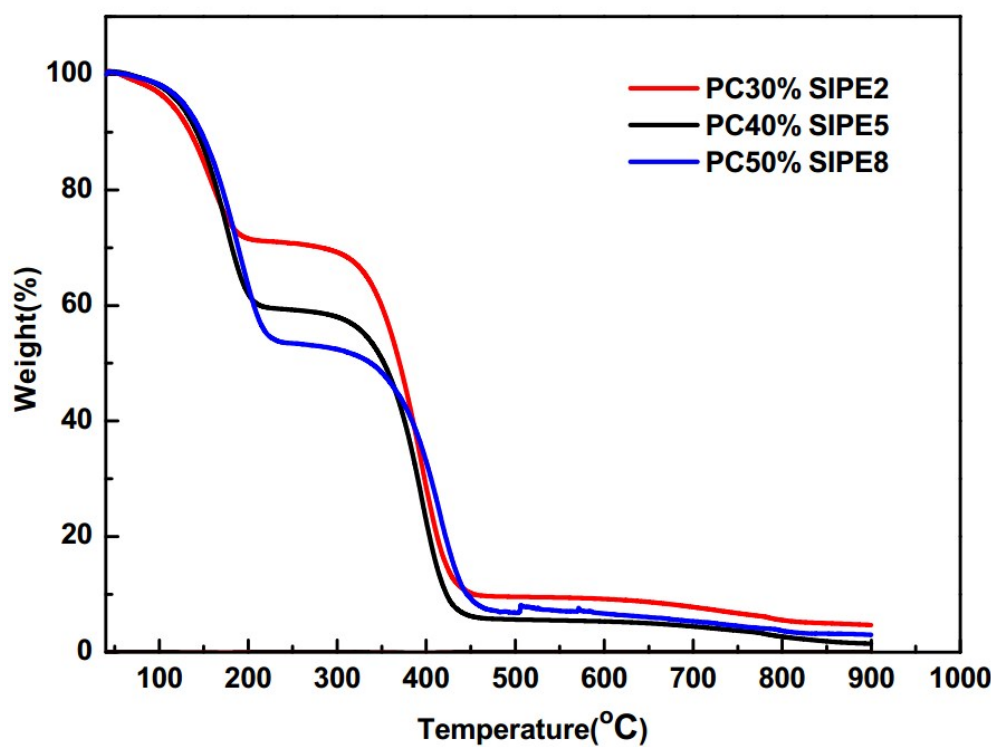

**Figure S3.** TGA traces measured under N<sub>2</sub> for SIPE (2, 5, 8).

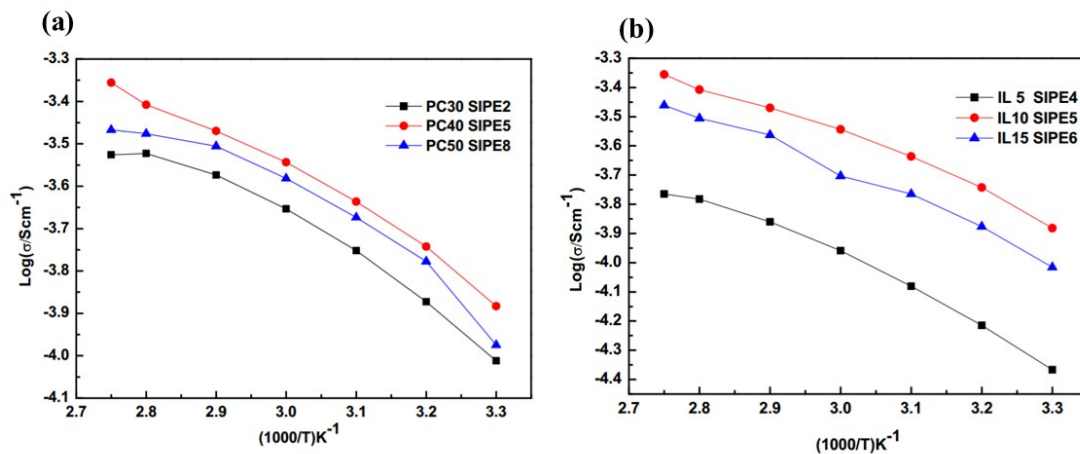

**Figure S4.** Ionic conductivities as a function of temperature indicating the effects of the contents of (a) PC(SIPE2,5,8) and (b) IL(SIPE4,5,6).

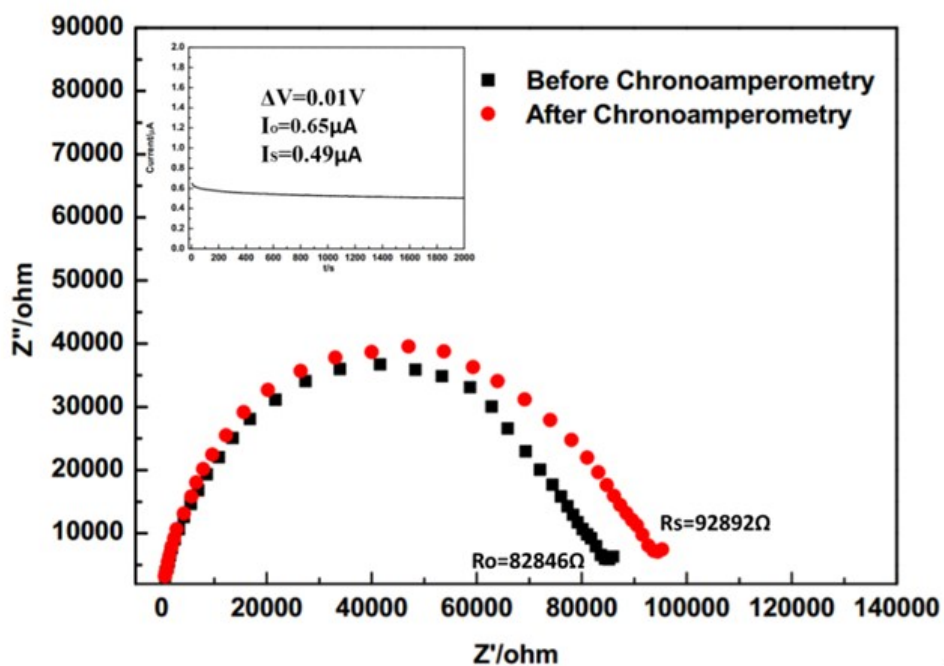

**Figure S5.** Impedance spectra before and after chronoamperometry for a Li symmetric cell with SIPE2 polymer electrolyte film; the inset is the time-dependence response of DC polarization.

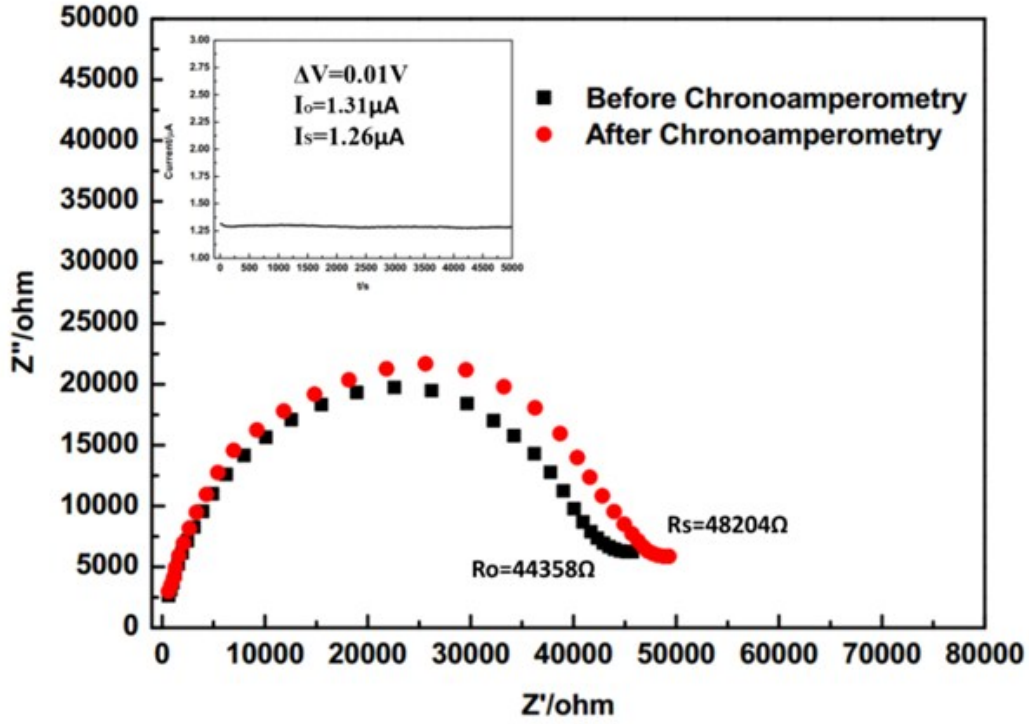

**Figure S6.** Impedance spectra before and after chronoamperometry for a Li symmetric cell with SIPE5 polymer electrolyte film; the inset is the time-dependence response of DC polarization.

**Table S2.** Values of the parameters in Equation S1 and the corresponding calculated values of lithium-ion transference number ( $t_{Li^+}$ )

| Samples | $I_0$<br>( $\mu\text{A}$ ) | $I_S$<br>( $\mu\text{A}$ ) | $R_0$<br>( $\text{K}\Omega$ ) | $R_S$<br>( $\text{K}\Omega$ ) | $\Delta V$<br>(mV) | $t_{Li^+}$ |
|---------|----------------------------|----------------------------|-------------------------------|-------------------------------|--------------------|------------|
| SIPE2   | 0.65                       | 0.49                       | 82.846                        | 92.890                        | 10                 | 0.90       |
| SIPE5   | 1.31                       | 1.26                       | 44.358                        | 48.204                        | 10                 | 0.91       |
| SIPE8   | 1.40                       | 1.38                       | 25.172                        | 26.417                        | 10                 | 0.94       |

$$t_{Li^+} = \frac{I_s[\Delta V - I_0 R_0]}{I_0[\Delta V - I_s R_s]} \quad (\text{S1})$$

where  $I_0$  and  $I_s$  are the initial and steady-state current determined by the DC

polarization, respectively;  $R_0$  and  $R_s$  are the interface resistance measured by AC impedance before and after polarization;  $\Delta V$  is the DV potential applied on the cell.

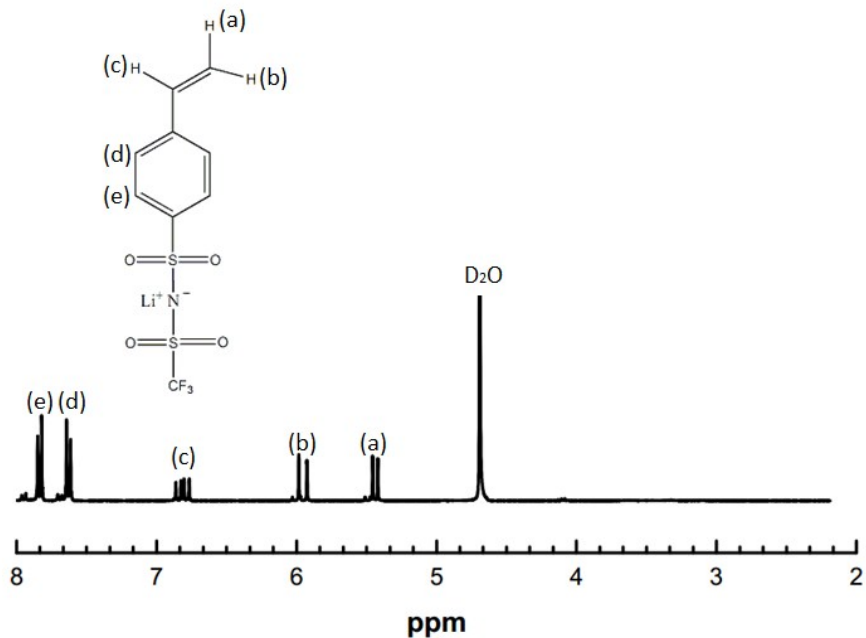

**Figure S7.**  $^1\text{H}$  NMR spectra of LiSTFSI

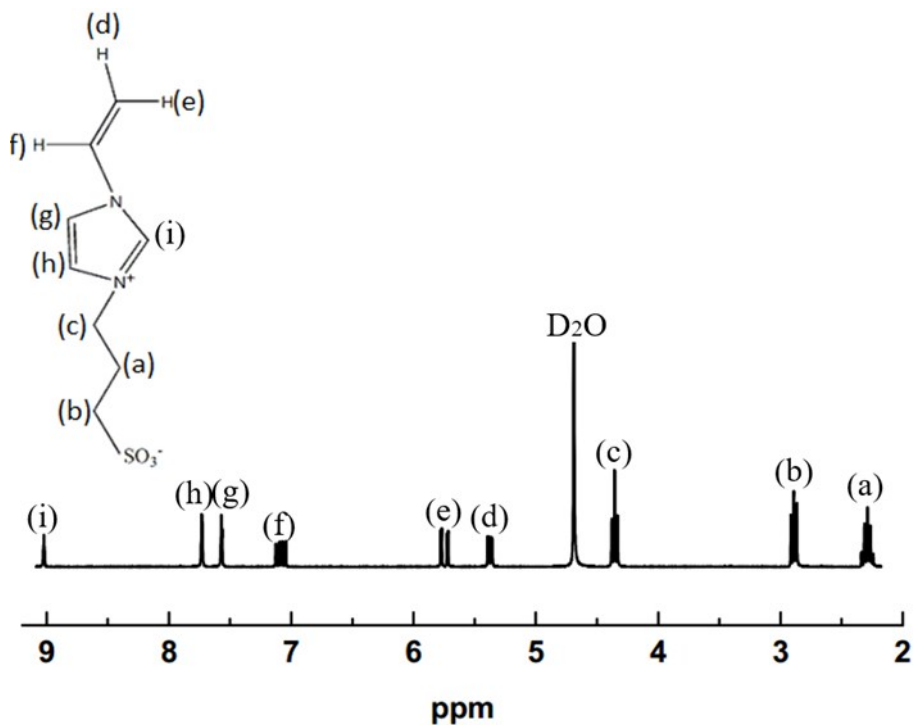

**Figure S8.**  $^1\text{H}$  NMR spectra of VIPs

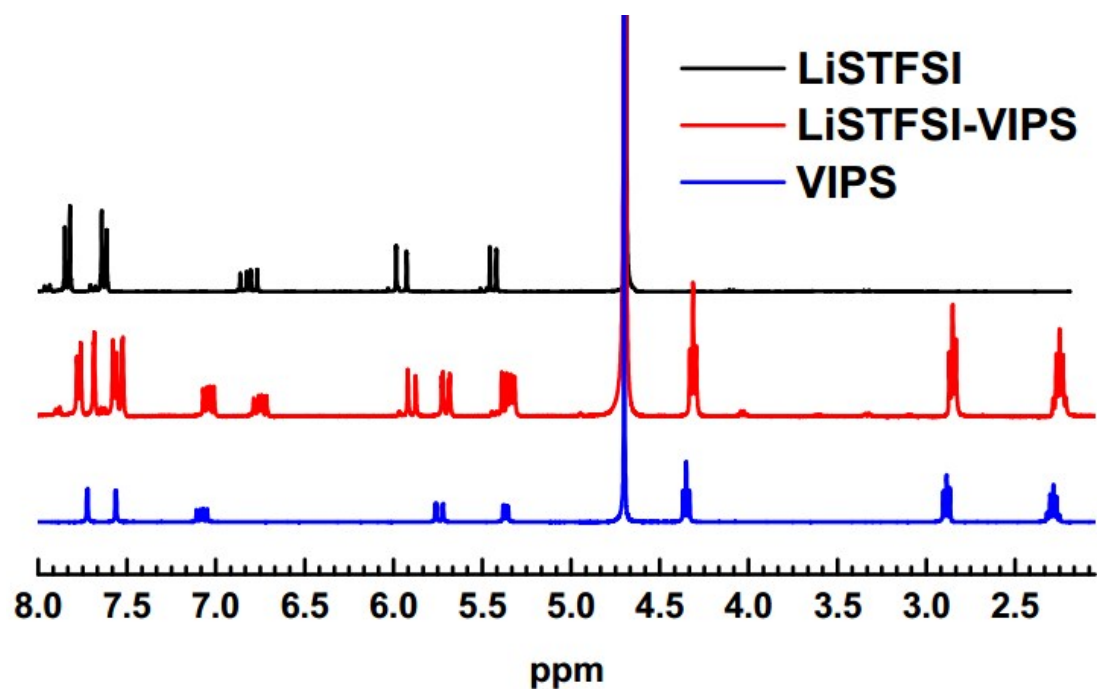

**Figure S9.** <sup>1</sup>H NMR spectra of LiSTFSI, VIPS, LiSTFSI-VIPS (n/n=1/1)
